# Supplementary material for: Discovering in vivo cytokine-eQTL interactions from a lupus clinical trial
Source: PubMed Central journal article supplement (PMC6195724; doi:10.1186/s13059-018-1560-8), 2018-10-19
Supplement: 13059_2018_1560_MOESM4_ESM.pdf [file 13059_2018_1560_MOESM4_ESM.pdf]

## LIST OF INDEPENDENT ETHICS COMMITTEE (IEC) OR INSTITUTIONAL REVIEW BOARD (IRB)

### ARGENTINA

| <u>Study Site Number</u> | <u>Independent Ethics Committee or Institutional Review Board Address(es)</u>                                                                                                                                             |
|--------------------------|---------------------------------------------------------------------------------------------------------------------------------------------------------------------------------------------------------------------------|
| 1115                     | Comité de Ética en Investigación - CEMIC<br>Investigation Department<br>Galvan 4102, 1st Floor<br>C.A.B.A., C1431FWO<br>ARGENTINA                                                                                         |
| 1116                     | Comite de Etica CAICI - CIAP<br>Comite de Etica CAICI - CIAP, Rodriguez 1198<br>Rosario, SANTA FE S2000PBJ<br>ARGENTINA                                                                                                   |
| 1119                     | Comite de Etica Institucional Framingham Centro Médico<br>Calle 9 N°431 e/40 y 41<br>La Plata, BUENOS AIRES B1902COS<br>ARGENTINA                                                                                         |
| 1123                     | Comité Independiente de Etica para Ensayos en Farmacología Clínica<br>J.E. Uriburu 774 - Piso 1, Fundación de Estudios Farmacologicos y de Medicamentos (FEFyM)<br>Ciudad Autónoma de Buenos Aires, C1027AAP<br>ARGENTINA |
| 1124                     | Comite Independiente de Etica para Ensayos en Farmacologia Clinica<br>J.E. Uriburu 774 - Piso 1<br>Ciudad Autónoma de Buenos Aires, C1027AAP<br>ARGENTINA                                                                 |

## CHILE

### **Study Site Number**   **Independent Ethics Committee or Institutional Review Board Address(es)**

1122      Comité de Ética Científico del Servicio de Salud Metropolitano Oriente  
Av. Salvador 364  
Providencia, SANTIAGO, RM 7600922  
CHILE

1136      Comité Ético Científico del Servicio de Salud Metropolitano Oriente  
Av. Salvador 364  
Providencia, SANTIAGO, RM 7500922  
CHILE

1138      Comité de Ético Científico del Servicio de Salud Metropolitano Oriente  
Av. Salvador 364  
Providencia, SANTIAGO, RM 7500922  
CHILE

## COLOMBIA

### **Study Site Number** **Independent Ethics Committee or Institutional Review Board Address(es)**

|      |                                                                                                                                                            |
|------|------------------------------------------------------------------------------------------------------------------------------------------------------------|
| 1117 | Comite de Etica Riesgo de Fractura S.A<br>Carrera 13, No. 97-25<br>Bogota<br>COLOMBIA                                                                      |
| 1118 | Comite de Etica en Investigación en el Area de la Salud de la Universidad del Norte<br>Km 5 Via a Puerto Colombia<br>Barranquilla, ATLANTICO 0<br>COLOMBIA |
| 1121 | Comite de Investigaciones y Etica en Investigaciones del Hospital Pablo Tobon Uribe<br>Calle 78 B No. 69-240<br>Medellin, ANTIOQUIA 0000<br>COLOMBIA       |
| 1131 | Comite de Etica Medica e Investigacion Clinica Las Americas<br>Almacentro Cra. 43A N°34-155, Piso 6, Of. 609<br>Medellin, ANTIOQUIA<br>COLOMBIA            |
| 1132 | Comite de Etica de la Investigacion Riesgo de Fractura S.A.<br>Carrera 13 #97-25<br>Bogota, Distrito Capital, CUNDINAMARCA<br>COLOMBIA                     |
| 1133 | Comite de ética en investigación Servimed E.U<br>Calle 51 No. 34-17, Cabecera I Etapa, Consultorio 208 C.C.<br>Bucaramanga, SANTANDER<br>COLOMBIA          |

## GERMANY

| <b><u>Study Site Number</u></b> | <b><u>Independent Ethics Committee or Institutional Review Board Address(es)</u></b>                                                                     |
|---------------------------------|----------------------------------------------------------------------------------------------------------------------------------------------------------|
| 1067                            | Ethik-Kommission der Medizinischen Fakultät der Friedrich-Alexander-Universität Erlangen-Nürnberg<br>Krankenhausstrasse 12<br>Erlangen, 91054<br>GERMANY |
| 1068                            | Ethik-Kommission der Medizinischen Fakultät der Friedrich-Alexander-Universität Erlangen-Nürnberg<br>Krankenhausstrasse 12<br>Erlangen, 91054<br>GERMANY |
| 1069                            | Ethik-Kommission der Medizinischen Fakultät der Friedrich-Alexander-Universität Erlangen-Nürnberg<br>Krankenhausstrasse 12<br>Erlangen, 91054<br>GERMANY |
| 1072                            | Ethik-Kommission der Medizinischen Fakultät der Friedrich-Alexander-Universität Erlangen-Nürnberg<br>Krankenhausstrasse 12<br>Erlangen, 91054<br>GERMANY |
| 1127                            | Ethik-Kommission der Medizinischen Fakultät der Friedrich-Alexander-Universität Erlangen-Nürnberg<br>Krankenhausstrasse 12<br>Erlangen, 91054<br>GERMANY |
| 1128                            | Ethik-Kommission der Medizinischen Fakultät der Friedrich-Alexander-Universität Erlangen-Nürnberg<br>Krankenhausstrasse 12<br>Erlangen, 91054<br>GERMANY |
| 1129                            | Ethik-Kommission der Medizinischen Fakultät der Friedrich-Alexander-Universität Erlangen-Nürnberg<br>Krankenhausstrasse 12<br>Erlangen, 91054<br>GERMANY |

| <b><u>Study Site Number</u></b> | <b><u>Independent Ethics Committee or Institutional Review Board Address(es)</u></b>                                                                     |
|---------------------------------|----------------------------------------------------------------------------------------------------------------------------------------------------------|
| 1149                            | Ethik-Kommission der Medizinischen Fakultät der Friedrich-Alexander-Universität Erlangen-Nürnberg<br>Krankenhausstrasse 12<br>Erlangen, 91054<br>GERMANY |

## HUNGARY

| <u>Study Site Number</u> | <u>Independent Ethics Committee or Institutional Review Board Address(es)</u> |
|--------------------------|-------------------------------------------------------------------------------|
|--------------------------|-------------------------------------------------------------------------------|

|      |                                                                                                                               |
|------|-------------------------------------------------------------------------------------------------------------------------------|
| 1112 | Egészségügyi Tudományos Tanács Klinikai Farmakológiai Etikai Bizottsága<br>Arany J. u. 6-8.<br>Budapest, H-1051<br>HUNGARY    |
| 1125 | Egészségügyi Tudományos Tanács Klinikai Farmakológiai Etikai Bizottsága<br>Arany J. u. 6-8.<br>Budapest, H-1051<br>HUNGARY    |
| 1126 | Egészségügyi Tudományos Tanács Klinikai Farmakológiai Etikai Bizottsága<br>Arany J. u. 6-8.<br>Budapest, H-1051<br>HUNGARY    |
| 1184 | Egészségügyi Tudományos Tanács<br>Klinikai Farmakológiai Etikai Bizottsága<br>Arany János u. 6-8<br>Budapest, 1051<br>HUNGARY |

**KOREA, REPUBLIC OF**

| <b><u>Study Site Number</u></b> | <b><u>Independent Ethics Committee or Institutional Review Board Address(es)</u></b>                                                                                                                                                                                                        |
|---------------------------------|---------------------------------------------------------------------------------------------------------------------------------------------------------------------------------------------------------------------------------------------------------------------------------------------|
| 1090                            | Yeouido St. Marys Hospital<br>62 Yeouido-dong Institutional Review Board of the Catholic University of Korea, Yeongdeungpo-gu, Office #134<br>Seoul, 150-713<br>KOREA, REPUBLIC OF                                                                                                          |
| 1170                            | Gachon University Gil Hospital IRB<br>Namdong-gu Gachon University Gil Hospital, 1198, Guwol-dong<br>Incheon, 405-760<br>KOREA, REPUBLIC OF                                                                                                                                                 |
| 1171                            | Dong-A University Medical Center Genetic Institutional Review Board<br>1, Dongdaesin-dong 3-ga<br>Seo-gu, BUSAN 602-715<br>KOREA, REPUBLIC OF<br><br>Dong-A University Medical Center Institutional Review Board<br>Seo-gu, 1, Dongdaesin-dong 3-ga<br>Busan, 602-715<br>KOREA, REPUBLIC OF |

**MOLDOVA, REPUBLIC OF**

**Study Site Number   Independent Ethics Committee or Institutional Review Board Address(es)**

1148

National Ethics Committee  
27 Nicolae Testemiteanu St.  
Chisinau, MD-2025  
MOLDOVA, REPUBLIC OF



## PERU

| <b><u>Study Site Number</u></b> | <b><u>Independent Ethics Committee or Institutional Review Board Address(es)</u></b>                                                                                                                                                                                                                                       |
|---------------------------------|----------------------------------------------------------------------------------------------------------------------------------------------------------------------------------------------------------------------------------------------------------------------------------------------------------------------------|
| 1108                            | Comite Institucional de Etica en Investigacion de la Universidad de<br>Av. Alameda del Corregidor 1531 Urb. Los Sirius, San Martin de Porres-Clinica CADAMUJER<br>La Molina-Lima, L-12<br>PERU                                                                                                                             |
| 1109                            | Comite Institucional de Etica en Investigacion de la Universidad de<br>Av. Alameda del Corregidor 1531 Urb. Los Sirius, San Martin de Porres-Clinica CADAMUJER<br>La Molina-Lima, L-12<br>PERU                                                                                                                             |
| 1110                            | Comite de Etica en Investigacion- Clinica Anglo Americana<br>Alfredo Salazar 350<br>San Isidro, LIMA Lima 27<br>PERU<br><br>Comite Institucional de Etica en Investigacion de la Universidad de<br>Av. Alameda del Corregidor 1531 Urb. Los Sirius, San Martin de Porres-Clinica CADAMUJER<br>La Molina-Lima, L-12<br>PERU |
| 1111                            | Comite Institucional de Etica de la Universidad Peruana Cayetano Heredia<br>Av. Honorio Delgado 430., Urb. Ingenieria. San Martin de Porres.<br>Lima, LIMA L31<br>PERU                                                                                                                                                     |

## POLAND

| <b><u>Study Site Number</u></b> | <b><u>Independent Ethics Committee or Institutional Review Board Address(es)</u></b>                                                    |
|---------------------------------|-----------------------------------------------------------------------------------------------------------------------------------------|
| 1063                            | Komisja Bioetyczna przy Okregowej Izbie Lekarskiej Wielkopolskiej Izby Lekarskiej<br>UL. Nowowiejskiego 51<br>Poznan, 61-734<br>POLAND  |
| 1064                            | Komisja Bioetyczna przy Okregowej Radzie Lekarskiej Wielkopolskiej Izby Lekarskiej<br>UL. Nowowiejskiego 51<br>Poznan, 61-734<br>POLAND |
| 1066                            | Komisja Bioetyczna przy Okregowej Radzie Lekarskiej Wielkopolskiej Izby Lekarskiej<br>UL. Nowowiejskiego 51<br>Poznan, 61-734<br>POLAND |
| 1141                            | Komisja Bioetyczna przy Okregowej Radzie Lekarskiej Wielkopolskiej Izby Lekarskiej<br>UL. Nowowiejskiego 51<br>Poznan, 61-734<br>POLAND |

**PUERTO RICO**

**Study Site Number** **Independent Ethics Committee or Institutional Review Board Address(es)**

1037

WESTERN IRB  
WESTERN IRB  
3535 7TH AVE SW  
OLYMPIA, WA 98502  
UNITED STATES

University of Puerto Rico  
Medical Sciences Campus, Alan Preston Ph.D, PO Box 365067  
San Juan, 00936-5067  
PUERTO RICO

## ROMANIA

| <b><u>Study Site Number</u></b> | <b><u>Independent Ethics Committee or Institutional Review Board Address(es)</u></b>                                                                                        |
|---------------------------------|-----------------------------------------------------------------------------------------------------------------------------------------------------------------------------|
| 1085                            | Comisia Națională de Bioetică a Medicamentului și a Dispozitivelor Medicale Ministerul Sanatatii<br>Sos. Stefan cel Mare nr.19-21, sector 2<br>Bucuresti, 020125<br>ROMANIA |
| 1086                            | MINISTRY OF HEALTH<br>NATIONAL ETHICS COMMITTEE FOR THE CLINICAL STUDY OF MEDICINES<br>48, Av. Sanatescu Street, District 1<br>Bucharest, 011278<br>ROMANIA                 |
| 1087                            | Comisia Națională de Bioetică a Medicamentului și a Dispozitivelor Medicale<br>Sos. Stefan cel Mare street, nr.19-21, sector 2<br>Bucuresti, 020125<br>ROMANIA              |
| 1183                            | Comisia Națională de Bioetică a Medicamentului și a Dispozitivelor Medicale<br>Sos. Stefan cel Mare nr.19-21<br>Bucuresti, SECTOR 2 020125<br>ROMANIA                       |

**TAIWAN**

**Study Site Number   Independent Ethics Committee or Institutional Review Board Address(es)**

1081      National Taiwan University Hospital Research Ethics Committee  
7, Chung-Shan South Road  
Taipei, 100  
TAIWAN

1082      China Medical University Hospital  
No.2, Yude Rd., The Institutional Review Board  
Taichung, 40447  
TAIWAN

1083      Buddhist Tzu Chi General Hospital  
Research Ethics Committee  
707, Sec. 3, Chung-Yang Rd, Hualien City  
Hualien, 97002  
TAIWAN

**UNITED STATES**

**Study Site Number   Independent Ethics Committee or Institutional Review Board Address(es)**

- |      |                                                                                                                                                                                                      |
|------|------------------------------------------------------------------------------------------------------------------------------------------------------------------------------------------------------|
| 1002 | Copernicus Group Independent Review Board<br>One Triangle Dr, PO Box 110605, Ste 100<br>Research Triangle Park, NC 27709<br>UNITED STATES                                                            |
| 1004 | Copernicus Group Independent Review Board<br>One Triangle Dr, PO Box 110605, Ste 100<br>Research Triangle Park, NC 27709<br>UNITED STATES                                                            |
| 1005 | Cedars-Sinai Medical Center<br>383 Wilshire Boulevard Institutional Review Board, Ste 742<br>Los Angeles, CA 90211<br>UNITED STATES                                                                  |
| 1008 | Copernicus Group Independent Review Board<br>One Triangle Dr, PO Box 110605, Ste 100<br>Research Triangle Park, NC 27709<br>UNITED STATES                                                            |
| 1009 | Copernicus Group Independent Review Board<br>One Triangle Dr, PO Box 110605, Ste 100<br>Research Triangle Park, NC 27709<br>UNITED STATES                                                            |
| 1010 | University of Southern California Health Science Campus Institutional Review Board<br>LAC/USC Medical Center<br>1200 N State St, General Hospital Ste 4700<br>Los Angeles, CA 90033<br>UNITED STATES |
| 1011 | UCLA of the Human Research Protection Program<br>11000 Kinross Ave, Ste 211<br>Los Angeles, CA 90095-1694<br>UNITED STATES                                                                           |

**Study Site Number** **Independent Ethics Committee or Institutional Review Board Address(es)**

- 1015 University of Texas Southwestern Medical Center  
5323 Harry Hines Boulevard Institutional Review Board, C1.206  
Dallas, TX 75390-8843  
UNITED STATES
- 1017 Biomedical Research Alliance of New York (BRANY) Institutional Review Board  
1981 Marcus Ave, Ste 210  
Lake Success, NY 11042  
UNITED STATES
- 1018 Copernicus Group Independent Review Board  
One Triangle Dr, PO Box 110605, Ste 100  
Research Triangle Park, NC 27709  
UNITED STATES
- 1019 Copernicus Group Independent Review Board  
One Triangle Dr, PO Box 110605, Ste 100  
Research Triangle Park, NC 27709  
UNITED STATES
- 1020 Oklahoma Medical Research Foundation  
825 Ne 13th St  
Oklahoma City, OK 73104  
UNITED STATES
- 1021 New York University School of Medicine Institutional Review Board  
One Park Ave, Sixth Fl  
New York, NY 10016  
UNITED STATES
- 1022 Copernicus Group Independent Review Board  
One Triangle Dr, PO Box 110605, Ste 100  
Research Triangle Park, NC 27709  
UNITED STATES

**Study Site Number**   **Independent Ethics Committee or Institutional Review Board Address(es)**

- 1023      The University of Chicago Institutional Review Board  
5751 S Woodlawn Ave, McGiffert Hall, 2nd Fl  
Chicago, IL 60637  
UNITED STATES
  
- 1024      The University of North Carolina at Chapel Hill  
School of Medicine Bldg 52Office of Human Research Ethics, CB 7097  
Chapel Hill, NC 27599-7097  
UNITED STATES
  
- 1025      MedStar Health Research Institute  
6525 Belcrest Rd, Ste 700  
Hyattsville, MD 20782  
UNITED STATES
  
- 1026      Copernicus Group Independent Review Board  
One Triangle Dr, PO Box 110605, Ste 100  
Research Triangle Park, NC 27709  
UNITED STATES
  
- 1027      Copernicus Group Independent Review Board  
One Triangle Dr, PO Box 110605, Ste 100  
Research Triangle Park, NC 27709  
UNITED STATES
  
- 1028      Copernicus Group Independent Review Board  
One Triangle Dr, PO Box 110605, Ste 100  
Research Triangle Park, NC 27709  
UNITED STATES
  
- 1030      Copernicus Group Independent Review Board  
One Triangle Dr, PO Box 110605, Ste 100  
Research Triangle Park, NC 27709  
UNITED STATES



**Study Site Number**   **Independent Ethics Committee or Institutional Review Board Address(es)**

1033      University of Michigan Medical School Institutional Review Board - IRBMED  
2800 Plymouth Rd, Bldg 520, Ste 3214  
Ann Arbor, MI 48109-2800  
UNITED STATES

1034      Johns Hopkins Medicine Institutional Review Board  
1620 McElderry Street, Reed Hall - B130  
Baltimore, MD 21205  
UNITED STATES

1036      Western Institutional Review Board  
1019 39th Ave S E  
Puyallup, WA 98374  
UNITED STATES

1040      Copernicus Group  
PO Box 110605 Institutional Review Board, One Triangle Dr, Ste 100  
Research Triangle Park, NC 27709  
UNITED STATES

1041      Copernicus Group Independent Review Board  
P.O 110605, Copernicus Group Independent Review Board  
Research Triangle Park, NC 27709  
UNITED STATES

Copernicus Group Independent Review Board  
P.O. Box 110605, One Triangle Dr, Ste 100  
Research Triangle Park, NC 27709  
UNITED STATES

1043      Emory University Institutional Review Board  
1599 Clifton Rd, 5th Fl, E  
Atlanta, GA 30322  
UNITED STATES

**Study Site Number**   **Independent Ethics Committee or Institutional Review Board Address(es)**

- 1044      Cleveland Clinic Institutional Review Board  
Cleveland Clinic Foundation  
9500 Euclid Ave, OS-1  
Cleveland, OH 44195  
UNITED STATES
- 1046      Copernicus Group  
P.O. Box 110605 Institutional Review Board, One Triangle Dr, Ste 100  
Research Triangle Park, NC 27709  
UNITED STATES
- 1047      Tufts Medical Center/Tufts University Institutional Review Board  
800 Washington St, Box 817  
Boston, MA 02111  
UNITED STATES
- 1050      Copernicus Group  
P.O. Box 110605 Institutional Review Board, One Triangle Dr, Ste 100  
Research Triangle Park, NC 27709  
UNITED STATES
- 1052      Copernicus Group Independent Review Board  
Ste 100, One Triangle Dr, PO Box 110605  
Durham, NC 27709  
UNITED STATES
- 1055      Copernicus Group Independent Review Board  
P.O. Box 110605, One Triangle Dr, Ste 100  
Research Triangle Park, NC 27709  
UNITED STATES
- Copernicus Group Independent Review Board  
P.O 110605, Copernicus Group Independent Review Board  
Research Triangle Park, NC 27709  
UNITED STATES

**Study Site Number**   **Independent Ethics Committee or Institutional Review Board Address(es)**

|      |                                                                                                                                                                                                                                                                                                                         |
|------|-------------------------------------------------------------------------------------------------------------------------------------------------------------------------------------------------------------------------------------------------------------------------------------------------------------------------|
| 1056 | <p>Copernicus Group Independent Review Board<br/>P.O. Box 110605, One Triangle Dr, Ste 100<br/>Research Triangle Park, NC 27709<br/>UNITED STATES</p> <p>Copernicus Group Independent Review Board<br/>P.O 110605, Copernicus Group Independent Review Board<br/>Research Triangle Park, NC 27709<br/>UNITED STATES</p> |
| 1062 | <p>Copernicus Group Independent Review Board<br/>P.O 110605, Copernicus Group Independent Review Board<br/>Research Triangle Park, NC 27709<br/>UNITED STATES</p> <p>Copernicus Group Independent Review Board<br/>P.O. Box 110605, One Triangle Dr, Ste 100<br/>Research Triangle Park, NC 27709<br/>UNITED STATES</p> |
| 1143 | <p>Copernicus Group Independent Review Board<br/>One Triangle Dr, PO Box 110605, Ste 100<br/>Research Triangle Park, NC 27709<br/>UNITED STATES</p>                                                                                                                                                                     |
| 1144 | <p>Western Institutional Review Board<br/>3535 Seventh AVE SW<br/>OLYMPIA, WA 98502<br/>UNITED STATES</p>                                                                                                                                                                                                               |
| 1152 | <p>Copernicus Group Independent Review Board<br/>P.O 110605, Copernicus Group Independent Review Board<br/>Research Triangle Park, NC 27709<br/>UNITED STATES</p>                                                                                                                                                       |

**Study Site Number** **Independent Ethics Committee or Institutional Review Board Address(es)**

- Copernicus Group Independent Review Board  
P.O. Box 110605, One Triangle Dr, Ste 100  
Research Triangle Park, NC 27709  
UNITED STATES
- 1155 Henry Ford Health System  
2799 W Grand Boulevard Institutional Review Board, CFP Bsmt, Rm 046 Henry Ford Hospital, Research Administration  
Detroit, MI 48202  
UNITED STATES
- 1156 Copernicus Group Independent Review Board  
P.O 110605, Copernicus Group Independent Review Board  
Research Triangle Park, NC 27709  
UNITED STATES
- Copernicus Group Independent Review Board  
P.O. Box 110605, One Triangle Dr, Ste 100  
Research Triangle Park, NC 27709  
UNITED STATES
- 1159 Copernicus Group  
P.O. Box 110605 Institutional Review Board, One Triangle Dr, Ste 100  
Research Triangle Park, NC 27709  
UNITED STATES
- 1160 Copernicus Group Independent Review Board  
P.O. Box 110605, One Triangle Dr, Ste 100  
Research Triangle Park, NC 27709  
UNITED STATES
- 1161 Copernicus Group Independent Review Board  
P.O. Box 110605, One Triangle Dr, Ste 100  
Research Triangle Park, NC 27709  
UNITED STATES

**Study Site Number**   **Independent Ethics Committee or Institutional Review Board Address(es)**

- Copernicus Group Independent Review Board  
P.O 110605, Copernicus Group Independent Review Board  
Research Triangle Park, NC 27709  
UNITED STATES
- 1163                    Copernicus Group  
P.O. Box 110605 Institutional Review Board, One Triangle Dr, Ste 100  
Research Triangle Park, NC 27709  
UNITED STATES
- 1165                    Copernicus Group Independent Review Board  
P.O 110605, Copernicus Group Independent Review Board  
Research Triangle Park, NC 27709  
UNITED STATES
- Copernicus Group Independent Review Board  
P.O. Box 110605, One Triangle Dr, Ste 100  
Research Triangle Park, NC 27709  
UNITED STATES
- 1169                    Copernicus Group Independent Review Board  
One Triangle Dr, Ste 100  
Research Triangle Park, NC 27709  
UNITED STATES
- 1172                    Indiana University Institutional Review Board c/o Research Compliance Administration  
980 Indiana Ave, Lockefield, 3rd Fl  
Indianapolis, IN 46202  
UNITED STATES
- 1173                    Copernicus Group Independent Review Board  
P.O. Box 110605, One Triangle Dr, Ste 100  
Research Triangle Park, NC 27709  
UNITED STATES

**Study Site Number**   **Independent Ethics Committee or Institutional Review Board Address(es)**

- 1174      Copernicus Group Independent Review Board  
P.O. Box 110605, One Triangle Dr, Ste 100  
Research Triangle Park, NC 27709  
UNITED STATES
- Copernicus Group Independent Review Board  
P.O 110605, Copernicus Group Independent Review Board  
Research Triangle Park, NC 27709  
UNITED STATES
- 1179      Copernicus Group Independent Review Board  
P.O. Box 110605, One Triangle Dr, Ste 100  
Research Triangle Park, NC 27709  
UNITED STATES
- Copernicus Group Independent Review Board  
P.O 110605, Copernicus Group Independent Review Board  
Research Triangle Park, NC 27709  
UNITED STATES
- 1189      Copernicus Group Independent Review Board  
P.O 110605, Copernicus Group Independent Review Board  
Research Triangle Park, NC 27709  
UNITED STATES
- Copernicus Group Independent Review Board  
P.O. Box 110605, One Triangle Dr, Ste 100  
Research Triangle Park, NC 27709  
UNITED STATES
- 1191      Copernicus Group Independent Review Board  
P.O. Box 110605, One Triangle Dr, Ste 100  
Research Triangle Park, NC 27709  
UNITED STATES

**Study Site Number** **Independent Ethics Committee or Institutional Review Board Address(es)**

Copernicus Group Independent Review Board  
P.O 110605, Copernicus Group Independent Review Board  
Research Triangle Park, NC 27709  
UNITED STATES
